# Supplementary material for: Designing potentially singlet fission materials with an anti-Kasha behaviour
Source: Royal Society of Chemistry journal article supplement (doi:10.1039/d4cp01284d), 2024-01-01

## SUPPORTING INFORMATION

### Designing potentially singlet fission materials with an Anti-Kasha behaviour

Ricardo Pino-Rios<sup>\*a,b</sup>, Rodrigo Báez-Grez<sup>c</sup>, Dariusz W. Szczepanik<sup>d</sup> and Miquel Solà<sup>\*e</sup>

<sup>a</sup> Centro de Investigación Medicina de Altura – CEIMA, Universidad Arturo Prat. Casilla 121, Iquique 1100000, Chile. rpinorios@unap.cl

<sup>b</sup> Química y Farmacia, Facultad de Ciencias de la Salud, Universidad Arturo Prat, Casilla 121, Iquique 1100000, Chile.

<sup>c</sup> Facultad de Ciencias, Universidad Arturo Prat, Casilla 121, Iquique 1100000, Chile.

<sup>d</sup> K. Guminski Department of Theoretical Chemistry, Faculty of Chemistry, Jagiellonian University, Krakow, Poland.

<sup>e</sup> Institut de Química Computacional i Catàlisi (IQCC) and Departament de Química, Universitat de Girona, C/ Maria Aurèlia Capmany 6, 17003 Girona, Catalonia, Spain.

## SUPPORTING INFORMATION

|                                                                                                                                                                                                                               |                |
|-------------------------------------------------------------------------------------------------------------------------------------------------------------------------------------------------------------------------------|----------------|
| <b>Table 1.</b> Excited state energy values (in $\text{cm}^{-1}$ ) computed using regular the Tamm – Dancoff approximation and the 6-311G(d,p) basis set.                                                                     | <b>S3</b>      |
| <b>Table S2.</b> Excitation energies computed at the TD-LC- $\omega$ HPBE/6-311G(d,p)//B3LYP/6-311G(d,p) level for substituted azulenes. The numbers in the first column indicate the carbon atom containing the substituent. | <b>S4 – S5</b> |
| <b>Table S3.</b> Dipole moments at levels of theory used in this work.                                                                                                                                                        | <b>S6</b>      |
| <b>Table S4.</b> Values obtained for –OH compounds from equation 2 (relative to azulene) and those obtained from the sum of the monosubstituted compounds (additive approach).                                                | <b>S6</b>      |
| <b>Figure S1.</b> Frontier Molecular orbitals for Azulene and selected derivatives.                                                                                                                                           | <b>S7</b>      |
| <b>Figure S2.</b> Excited state energies calculated for azulene a) for substituted –CN compounds and b) for substituted –OH compounds at the TD-LC- $\omega$ HPBE/6-311G(d,p)//B3LYP/6-311G(d,p) level.                       | <b>S8</b>      |
| <b>Figure S3.</b> Computed vs. predicted values using the additive scheme for $S_2-2T_1$ relative to azulene for the substituted –CN compounds.                                                                               | <b>S9</b>      |
| <b>Figure S4.</b> Correlation between Computed vs. predicted values using the additive scheme for $S_2-2T_1$ relative to azulene for the substituted –CN compounds.                                                           | <b>S9</b>      |
| <b>Figure S4.</b> Computed vs. predicted values using the additive scheme for $S_2-2T_1$ relative to azulene for the substituted –OH compounds.                                                                               | <b>S10</b>     |
| <b>Figure S5.</b> Correlation between Computed vs. predicted values using the additive scheme for $S_2-2T_1$ relative to azulene for the substituted –OH compounds.                                                           | <b>S10</b>     |

**Table S1.** Values of energies (in  $\text{cm}^{-1}$ ) of excited states of interest using different methods with the Tamm-Damcoff approximation.

| Tamm-Damcoff approximation | $T_1$             | $S_1$             | $S_2$                                       | $S_2-2T_1$ |
|----------------------------|-------------------|-------------------|---------------------------------------------|------------|
|                            | H $\rightarrow$ L | H $\rightarrow$ L | H-1 $\rightarrow$ L;<br>H $\rightarrow$ L+1 | (Eq 2)     |
| Experimental               | 13900             | 14300             | 28800                                       | 1000       |
| DFT/MRCI                   | 14180             | 15400             | 27900                                       | -460       |
| CASSCF-NEVPT2              | 15383             | 15450             | 31446                                       | 680        |
| B3LYP                      | 16348             | 20149             | 30585                                       | -2112      |
| BHandHLYP                  | 17456             | 21551             | 31967                                       | -2946      |
| CAM-B3LYP                  | 16540             | 20642             | 31732                                       | -1348      |
| M06                        | 16469             | 19923             | 29786                                       | -3152      |
| M06-2X                     | 16907             | 20591             | 32578                                       | -1236      |
| M06-HF                     | 17521             | 21090             | 34468                                       | -573       |
| M11L                       | 17191             | 20268             | 28717                                       | -5664      |
| BP86                       | 15857             | 19469             | 29507                                       | -2207      |
| TPSS                       | 16232             | 19927             | 29938                                       | -2526      |
| WB97XD                     | 16643             | 20661             | 31678                                       | -1608      |
| B97D                       | 15905             | 19510             | 29334                                       | -2477      |
| PBE                        | 15841             | 19473             | 29591                                       | -2091      |
| PBE0                       | 16388             | 20436             | 31126                                       | -1649      |
| HSEH1PBE                   | 16379             | 20399             | 31017                                       | -1741      |
| LC-BLYP                    | 16955             | 21249             | 32930                                       | -981       |
| LC- $\omega$ HPBE          | 16552             | 21004             | 32822                                       | -282       |

**Table S2.** Excitation energies computed at the TD-LC- $\omega$ HPBE/6-311G(d,p)//B3LYP/6-311G(d,p) level for substituted azulenes. The numbers in the first column indicate the carbon atom containing the substituent.

| Position <sup>a</sup>       | Excitation energies |                |                |                     |                |                |                                |                                 |                                              |
|-----------------------------|---------------------|----------------|----------------|---------------------|----------------|----------------|--------------------------------|---------------------------------|----------------------------------------------|
|                             | in eV               |                |                | in cm <sup>-1</sup> |                |                |                                |                                 |                                              |
|                             | T <sub>1</sub>      | S <sub>1</sub> | S <sub>2</sub> | T <sub>1</sub>      | S <sub>1</sub> | S <sub>2</sub> | S <sub>2</sub> -S <sub>1</sub> | S <sub>2</sub> -2T <sub>1</sub> | S <sub>2</sub> -2T <sub>1</sub> <sup>b</sup> |
| Experimental <sup>c1</sup>  | 1.72                | 1.77           | 3.57           | 13900               | 14300          | 28800          | 14500                          | 1000                            | -                                            |
| DFT/MRCI <sup>c1</sup>      | 1.76                | 1.91           | 3.46           | 14180               | 15400          | 27900          | 12500                          | -460                            | -                                            |
| CASSCF-NEVPT2 <sup>d2</sup> | 1.91                | 1.92           | 3.90           | 15383               | 15450          | 31446          | 15996                          | 680                             | -                                            |
| Azulene                     | 1.86                | 2.38           | 3.87           | 14982               | 19164          | 31208          | 12044                          | 1245                            | 0                                            |
| CN1                         | 2.01                | 2.49           | 3.85           | 16183               | 20102          | 31086          | 10984                          | -1279                           | -2524                                        |
| CN2                         | 1.78                | 2.34           | 3.87           | 14349               | 18848          | 31227          | 12379                          | 2528                            | 1283                                         |
| CN6                         | 1.56                | 2.15           | 3.71           | 12620               | 17349          | 29922          | 12573                          | 4682                            | 3438                                         |
| CN7                         | 1.87                | 2.38           | 3.68           | 15069               | 19169          | 29691          | 10521                          | -447                            | -1691                                        |
| CN8                         | 1.61                | 2.14           | 3.66           | 13005               | 17291          | 29480          | 12189                          | 3471                            | 2226                                         |
| CN12                        | 1.90                | 2.44           | 3.85           | 15312               | 19701          | 31037          | 11336                          | 414                             | -831                                         |
| CN13                        | 2.13                | 2.59           | 3.87           | 17151               | 20891          | 31198          | 10307                          | -3104                           | -4348                                        |
| CN47                        | 1.60                | 2.13           | 3.50           | 12921               | 17176          | 28233          | 11056                          | 2391                            | 1146                                         |
| CN48                        | 1.40                | 1.94           | 3.50           | 11310               | 15679          | 28200          | 12521                          | 5581                            | 4337                                         |
| CN57                        | 1.89                | 2.36           | 3.54           | 15209               | 19061          | 28586          | 9525                           | -1832                           | -3077                                        |
| CN67                        | 1.55                | 2.15           | 3.55           | 12522               | 17367          | 28620          | 11253                          | 3576                            | 2332                                         |
| CN68                        | 1.38                | 1.97           | 3.52           | 11147               | 15921          | 28420          | 12498                          | 6127                            | 4882                                         |
| CN78                        | 1.65                | 2.16           | 3.47           | 13294               | 17413          | 27980          | 10567                          | 1393                            | 148                                          |
| CN123                       | 1.99                | 2.53           | 3.85           | 16040               | 20384          | 31088          | 10704                          | -992                            | -2237                                        |
| CN457                       | 1.64                | 2.14           | 3.36           | 13219               | 17227          | 27074          | 9847                           | 637                             | -607                                         |
| CN458                       | 1.42                | 1.95           | 3.33           | 11455               | 15763          | 26841          | 11078                          | 3930                            | 2686                                         |
| CN467                       | 1.35                | 1.96           | 3.38           | 10905               | 15777          | 27270          | 11493                          | 5461                            | 4217                                         |
| CN468                       | 1.21                | 1.81           | 3.38           | 9784                | 14611          | 27283          | 12673                          | 7715                            | 6470                                         |
| CN567                       | 1.56                | 2.14           | 3.42           | 12598               | 17230          | 27620          | 10391                          | 2424                            | 1179                                         |
| CN678                       | 1.40                | 1.99           | 3.35           | 11279               | 16044          | 27053          | 11009                          | 4495                            | 3250                                         |
| CN4578                      | 1.44                | 1.95           | 3.20           | 11582               | 15757          | 25787          | 10030                          | 2623                            | 1378                                         |
| CN4678                      | 1.21                | 1.82           | 3.23           | 9763                | 14640          | 26014          | 11374                          | 6487                            | 5243                                         |
| CN5678                      | 1.38                | 1.96           | 3.25           | 11136               | 15789          | 26186          | 10397                          | 3914                            | 2670                                         |
| CN45678                     | 1.21                | 1.80           | 3.10           | 9799                | 14549          | 24997          | 10447                          | 5399                            | 4155                                         |
| OH1a                        | 1.41                | 1.99           | 3.72           | 11405               | 16087          | 30019          | 13932                          | 7208                            | 5964                                         |
| OH1b                        | 1.38                | 1.97           | 3.67           | 11126               | 15903          | 29578          | 13675                          | 7327                            | 6082                                         |
| OH2                         | 2.18                | 2.68           | 3.72           | 17577               | 21620          | 29982          | 8362                           | -5172                           | -6417                                        |
| OH6a                        | 2.22                | 2.63           | 3.85           | 17895               | 21236          | 31048          | 9813                           | -4742                           | -5986                                        |
| OH6b                        | 2.22                | 2.63           | 3.85           | 17897               | 21233          | 31047          | 9814                           | -4747                           | -5991                                        |
| OH7a                        | 1.45                | 2.17           | 3.84           | 11714               | 17465          | 30939          | 13474                          | 7512                            | 6268                                         |
| OH7b                        | 1.49                | 2.14           | 3.84           | 12004               | 17259          | 30951          | 13691                          | 6943                            | 5698                                         |
| OH8a                        | 1.96                | 2.58           | 3.92           | 15826               | 20801          | 31632          | 10831                          | -20                             | -1265                                        |
| OH8b                        | 2.11                | 2.71           | 4.02           | 16998               | 21868          | 32445          | 10577                          | -1551                           | -2796                                        |

|         |      |      |      |       |       |       |       |        |        |
|---------|------|------|------|-------|-------|-------|-------|--------|--------|
| OH12a   | 1.66 | 2.29 | 3.59 | 13384 | 18475 | 28967 | 10492 | 2199   | 954    |
| OH12b   | 1.90 | 2.46 | 3.58 | 15300 | 19814 | 28852 | 9038  | -1749  | -2993  |
| OH13    | 1.08 | 1.68 | 3.67 | 8691  | 13561 | 29597 | 16037 | 12216  | 10972  |
| OH48    | 2.36 | 2.92 | 4.13 | 19016 | 23520 | 33312 | 9792  | -4720  | -5964  |
| OH56a   | 1.92 | 2.43 | 3.78 | 15469 | 19631 | 30472 | 10841 | -466   | -1711  |
| OH56b   | 1.73 | 2.33 | 3.76 | 13936 | 18775 | 30340 | 11565 | 2469   | 1224   |
| OH57    | 1.26 | 2.00 | 3.87 | 10130 | 16161 | 31225 | 15064 | 10966  | 9721   |
| OH58    | 1.48 | 2.30 | 3.84 | 11949 | 18558 | 30989 | 12431 | 7091   | 5847   |
| OH68    | 2.27 | 2.84 | 3.96 | 18348 | 22942 | 31974 | 9033  | -4722  | -5967  |
| OH78    | 1.75 | 2.41 | 3.87 | 14121 | 19472 | 31177 | 11706 | 2935   | 1691   |
| OH123   | 1.46 | 2.04 | 3.48 | 11757 | 16461 | 28090 | 11629 | 4576   | 3331   |
| OH456   | 2.21 | 2.74 | 3.95 | 17839 | 22136 | 31870 | 9734  | -3809  | -5053  |
| OH457a  | 1.45 | 2.29 | 3.92 | 11718 | 18431 | 31622 | 13190 | 8185   | 6940   |
| OH458a  | 1.84 | 2.73 | 4.08 | 14864 | 22001 | 32869 | 10868 | 3142   | 1897   |
| OH467   | 1.87 | 2.64 | 3.93 | 15086 | 21268 | 31736 | 10468 | 1565   | 320    |
| OH468   | 2.85 | 3.30 | 4.31 | 23015 | 26616 | 34734 | 8118  | -11296 | -12540 |
| OH478   | 2.02 | 2.72 | 4.05 | 16304 | 21944 | 32630 | 10686 | 21     | -1224  |
| OH567   | 1.57 | 2.19 | 3.74 | 12634 | 17696 | 30176 | 12481 | 4909   | 3664   |
| OH568   | 2.11 | 2.78 | 3.98 | 16997 | 22459 | 32093 | 9633  | -1902  | -3146  |
| OH578   | 1.43 | 2.21 | 3.84 | 11507 | 17841 | 30947 | 13106 | 7932   | 6688   |
| OH678   | 2.07 | 2.60 | 3.87 | 16680 | 20987 | 31238 | 10250 | -2121  | -3366  |
| OH4567  | 1.77 | 2.46 | 3.87 | 14265 | 19874 | 31217 | 11343 | 2687   | 1443   |
| OH4568a | 2.29 | 2.90 | 4.08 | 18502 | 23397 | 32932 | 9536  | -4072  | -5317  |
| OH4578  | 1.56 | 2.43 | 3.94 | 12616 | 19590 | 31809 | 12218 | 6577   | 5332   |
| OH4678  | 2.20 | 2.99 | 4.11 | 17766 | 24102 | 33110 | 9008  | -2422  | -3667  |
| OH5678  | 1.82 | 2.45 | 3.83 | 14691 | 19779 | 30882 | 11103 | 1499   | 255    |
| OH45678 | 2.03 | 2.69 | 3.99 | 16342 | 21728 | 32183 | 10455 | -502   | -1746  |

<sup>a</sup> In the OH-substituted compounds, isomers a and b are observed, these are relative to the position of the hydrogen in – OH, but do not change considerably the final result. <sup>b</sup> Equation 2 ( $S_2-2T_1$ ) relative to Azulene. <sup>c</sup> Ref. 37. <sup>d</sup> Ref. 22.

**Table S3.** Dipole moments at levels of theory used in this work.

| Level of Theory                         | Dipole Moment (Debye) |                |                |                |
|-----------------------------------------|-----------------------|----------------|----------------|----------------|
|                                         | S <sub>0</sub>        | T <sub>1</sub> | S <sub>1</sub> | S <sub>2</sub> |
| Adiabatic B3LYP-6-311G(d,p)             | 1.04                  | 0.53           | 0.30           | 0.56           |
| Vertical LC- $\omega$ HPBE/6-311G(d,p)  | 1.40                  | 0.64           | 0.70           | 0.70           |
| Adiabatic LC- $\omega$ HPBE/6-311G(d,p) | 1.40                  | 0.96           | 0.84           | 0.80           |

**Table S4.** Values obtained for –OH compounds from equation 2 (relative to azulene) and those obtained from the sum of the monosubstituted compounds (additive approach).

| Compound | Eq 2 <sup>a</sup> | Additive app. | Compound | Eq 2 <sup>a</sup> | Additive app. |
|----------|-------------------|---------------|----------|-------------------|---------------|
| OH12a    | 954               | –453          | OH467    | 320               | –983          |
| OH12b    | –2993             | –335          | OH468    | –12540            | –10046        |
| OH13     | 10972             | 11927         | OH478    | –1224             | 107           |
| OH48     | –5964             | –5591         | OH567    | 3664              | 5975          |
| OH56a    | –1711             | –288          | OH568    | –3146             | –2519         |
| OH56b    | 1224              | 277           | OH578    | 6688              | 9171          |
| OH57     | 9721              | 12535         | OH678    | –3366             | –2519         |
| OH58     | 5847              | 5003          | OH4567   | 1443              | 4146          |
| OH68     | –5967             | –7251         | OH4568a  | –5317             | –5310         |
| OH78     | 1691              | 3472          | OH4578   | 5332              | 5806          |
| OH123    | 3331              | 5510          | OH4678   | –3667             | –3779         |
| OH456    | –5053             | –8520         | OH5678   | 255               | 2615          |
| OH457a   | 6940              | 11271         | OH45678  | –1746             | –186          |
| OH458a   | 1897              | 3738          |          |                   |               |

<sup>a</sup> Values relative to Azulene following:  $S_{2,X} - 2T_{1,X} - S_{2,Azulene} - 2T_{1,Azulene}$ , where S<sub>x</sub> and T<sub>x</sub> represent the respective excited state values for X designed compound.

**Figure S1.** Frontier Molecular orbitals for Azulene and selected derivatives.

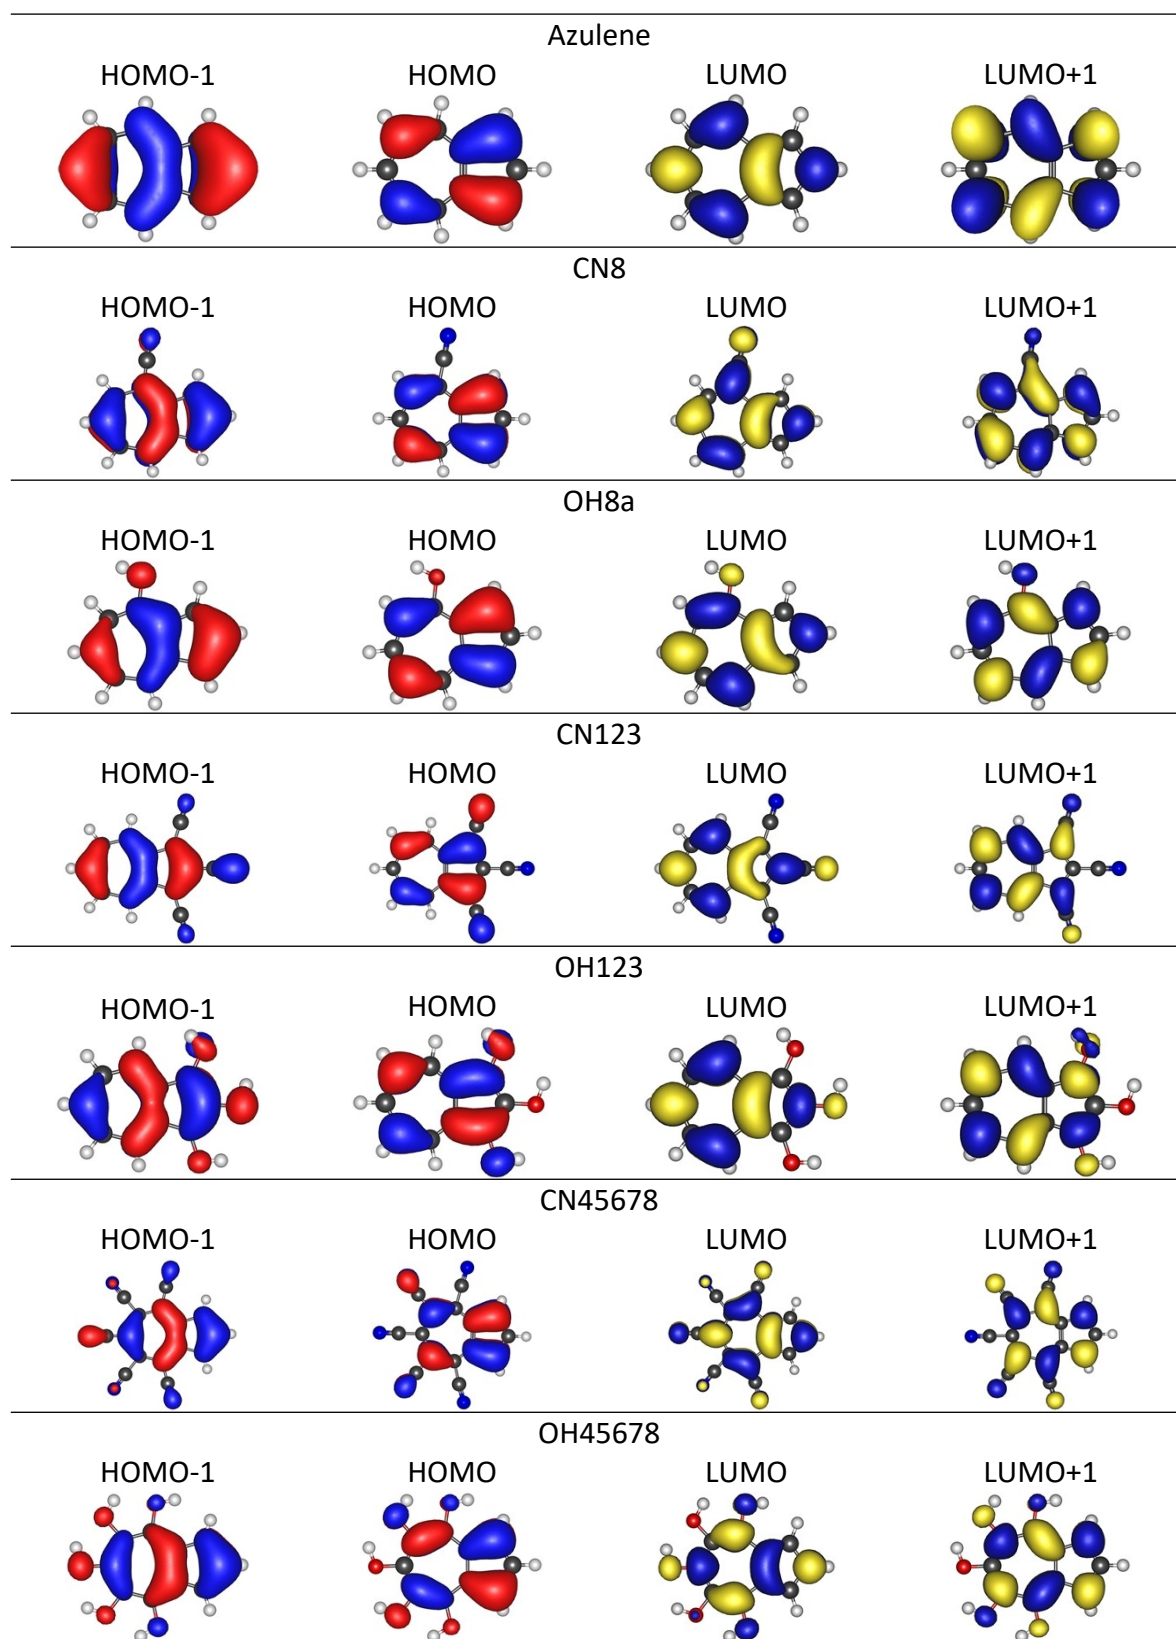

**Figure S2.** Excited state energies calculated for azulene a) for substituted –CN compounds and b) for substituted –OH compounds at the TD-LC- $\omega$ HPBE/6-311G(d,p)//B3LYP/6-311G(d,p) level.

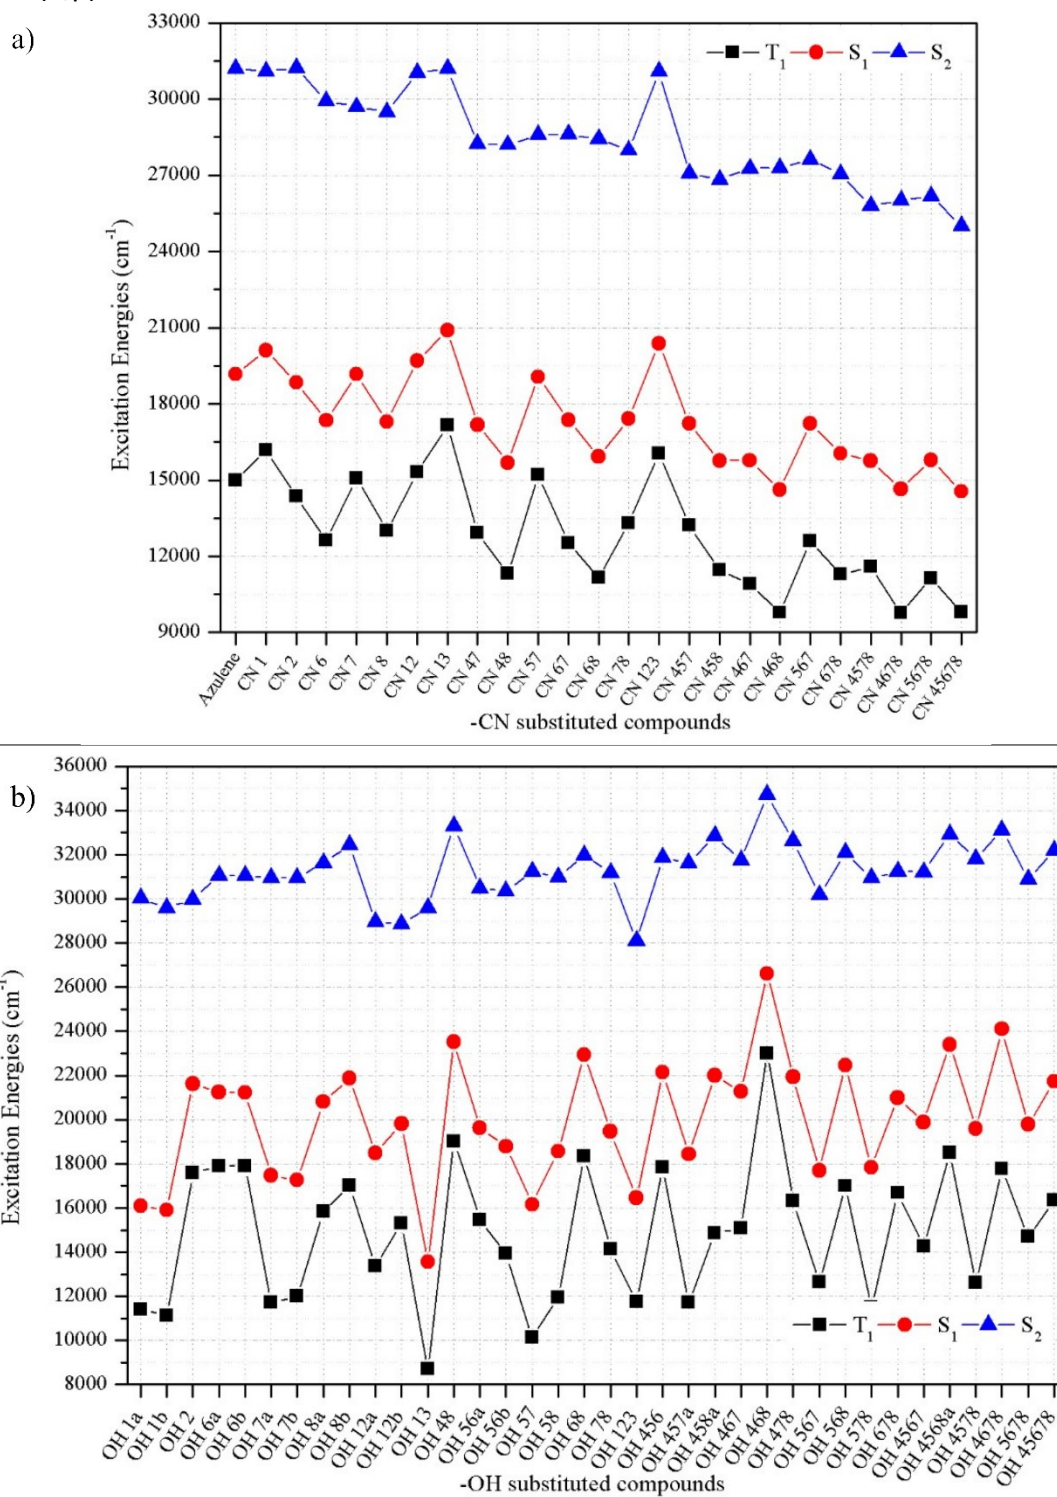



**Figure S3.** Computed vs. predicted values using the additive scheme for  $S_2-2T_1$  relative to azulene for the substituted -CN compounds.

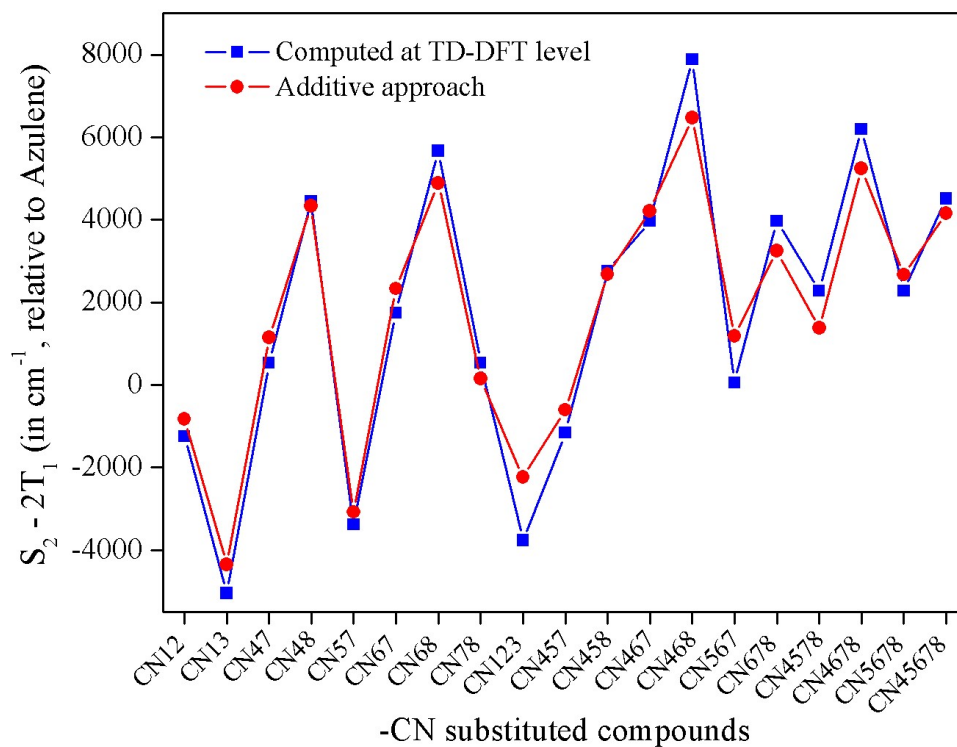

**Figure S4.** Correlation between Computed vs. predicted values using the additive scheme for  $S_2-2T_1$  relative to azulene for the substituted -CN compounds.

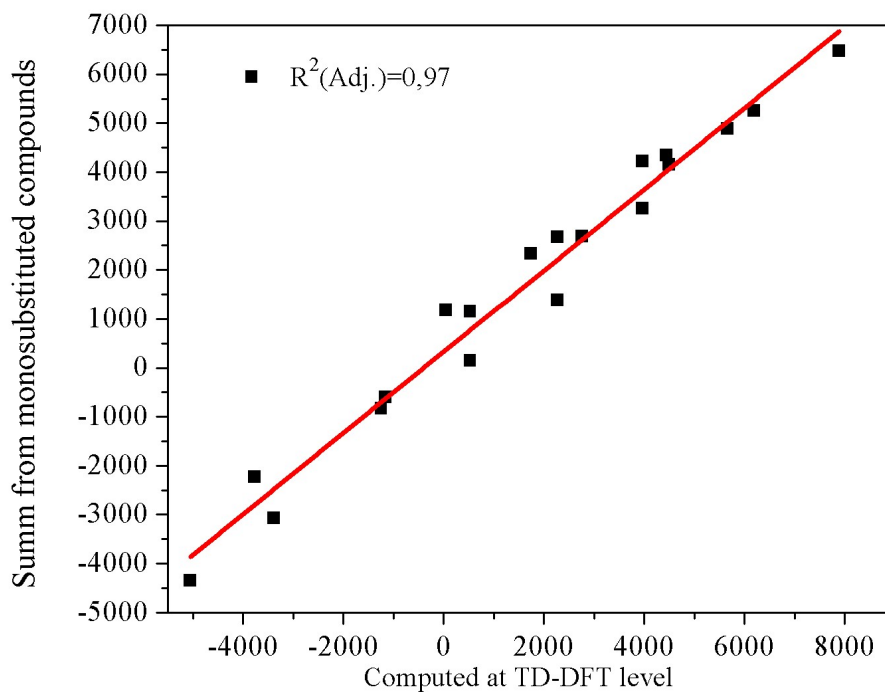

**Figure S5.** Computed vs. predicted values using the additive scheme for  $S_2-2T_1$  relative to azulene for the substituted  $-OH$  compounds.

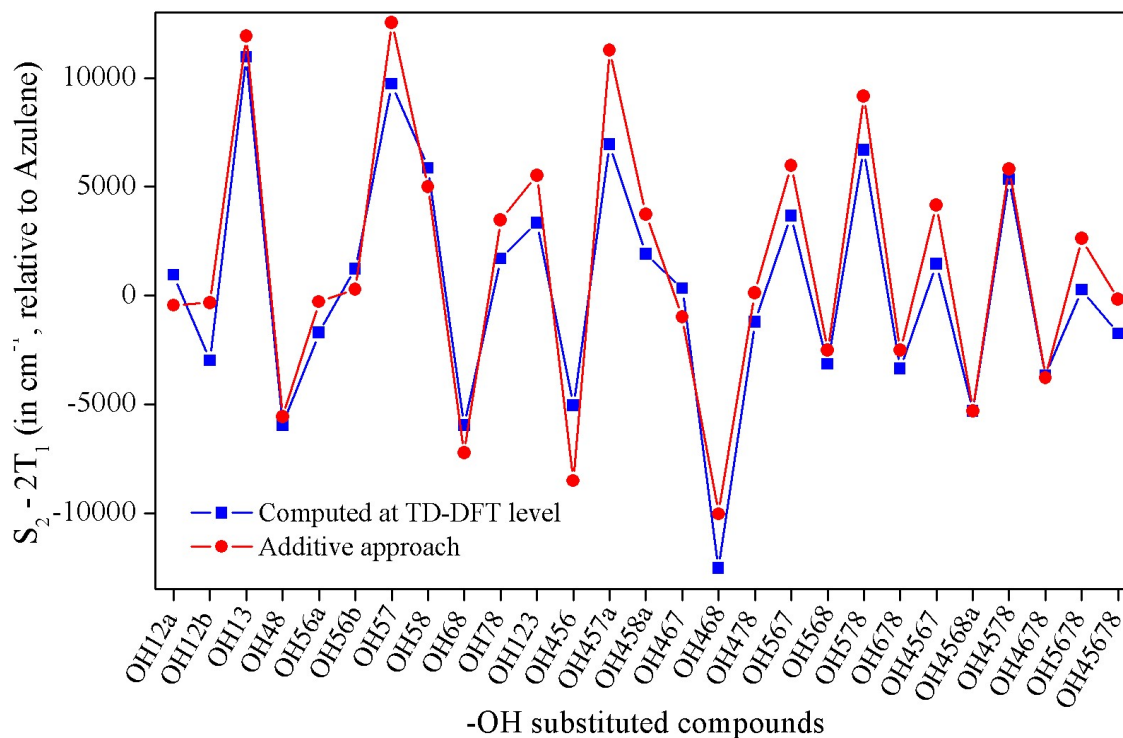

**Figure S6.** Correlation between Computed vs. predicted values using the additive scheme for  $S_2-2T_1$  relative to azulene for the substituted  $-OH$  compounds.

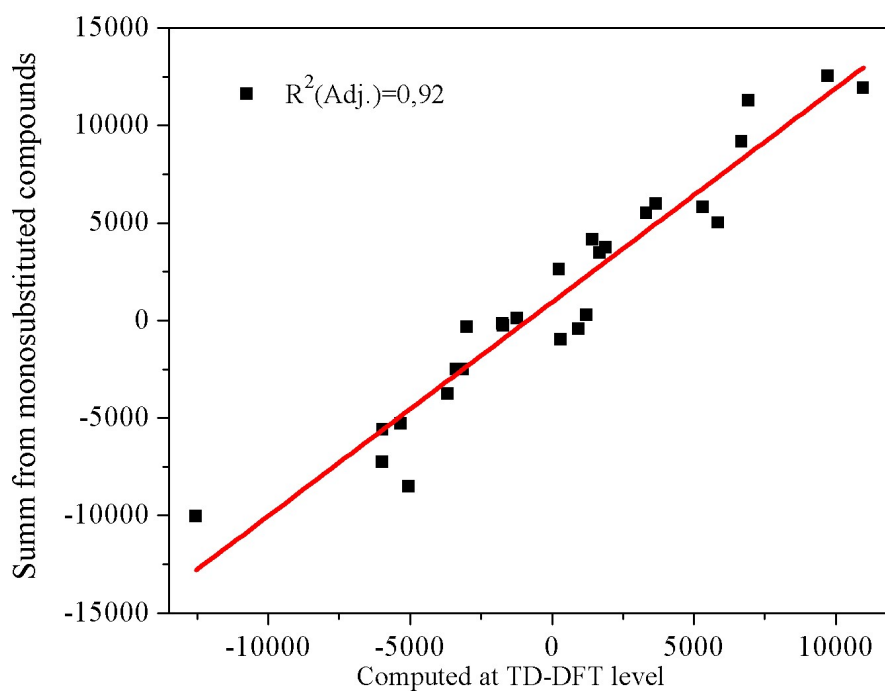

Supplement: d4cp01284d2.pdf [file d4cp01284d2.pdf]
